# Supplementary material for: Avatar-Based Strategies for Breast Cancer Patients: A Systematic Review
Source: MDPI journal article supplement (doi:10.3390/cancers15164031), 2023-08-09
Supplement: s1 [file s1]

**Supplementary file S3:** Reasons for studies exclusion.

| Excluded                       | Reason for exclusion                                                                                      |
|--------------------------------|-----------------------------------------------------------------------------------------------------------|
| Baxter [56]                    | Not QoL or well-being measured.                                                                           |
| De Maria Marchiano et al. [57] | Not QoL or well-being measured.                                                                           |
| Durosini et al. [1]            | Not QoL or well-being measured.                                                                           |
| Fu et al. [58]                 | Usability and feasibility study related with one of included studies [39].                                |
| Putranto et al. [59]           | Scoping review which includes only one study involving Avatar-based therapy for children (no BC patients) |
| Ryu & Price [60]               | Not QoL or well-being outcomes provided.                                                                  |
