# Supplementary material for: Avatar-Based Strategies for Breast Cancer Patients: A Systematic Review
Source: MDPI journal article supplement (doi:10.3390/cancers15164031), 2023-08-09
Supplement: s1 [file s1]

Supplementary file S2: Quality assessment of included studies.

| Authors              | Type study   | Screening Questions |     | Qualitative studies |     |     |     |     | Randomized controlled trials |     |     |     |     | Non-randomized studies |     |     |     |     | Quantitative descriptive studies |     |     |     |     | Mixed Methods studies |     |     |     |     |
|----------------------|--------------|---------------------|-----|---------------------|-----|-----|-----|-----|------------------------------|-----|-----|-----|-----|------------------------|-----|-----|-----|-----|----------------------------------|-----|-----|-----|-----|-----------------------|-----|-----|-----|-----|
|                      |              | S1                  | S2  | 1,1                 | 1,2 | 1,3 | 1,4 | 1,5 | 2,1                          | 2,2 | 2,3 | 2,4 | 2,5 | 3,1                    | 3,2 | 3,3 | 3,4 | 3,5 | 4,1                              | 4,2 | 4,3 | 4,4 | 4,5 | 5,1                   | 5,2 | 5,3 | 5,4 | 5,5 |
| Dang et al. [61]     | Mixed-method | Yes                 | Yes | Yes                 | Yes | Yes | Yes | Yes | -                            | -   | -   | -   | -   | -                      | -   | -   | -   | -   | -                                | -   | -   | -   | -   | Yes                   | Yes | Yes | Yes | Yes |
| Fu et al. [62]       | Mixed-method | Yes                 | Yes | Yes                 | Yes | Yes | Yes | Yes | -                            | -   | -   | -   | -   | -                      | -   | -   | -   | -   |                                  |     |     |     |     | Yes                   | Yes | Yes | Yes | Yes |
| Triberti et al. [63] | Quantitative | Yes                 | Yes | -                   | -   | -   | -   | -   | -                            | -   | -   | -   | -   | -                      | -   | -   | -   | -   | Yes                              | Yes | Yes | Yes | Yes | -                     | -   | -   | -   | -   |
